# Supplementary material for: Dendritic Cell-Derived Artificial Microvesicles Inhibit RLS40 Lymphosarcoma Growth in Mice via Stimulation of Th1/Th17 Immune Response
Source: MDPI journal article supplement (doi:10.3390/pharmaceutics14112542), 2022-11-21
Supplement: s1 [file s1]

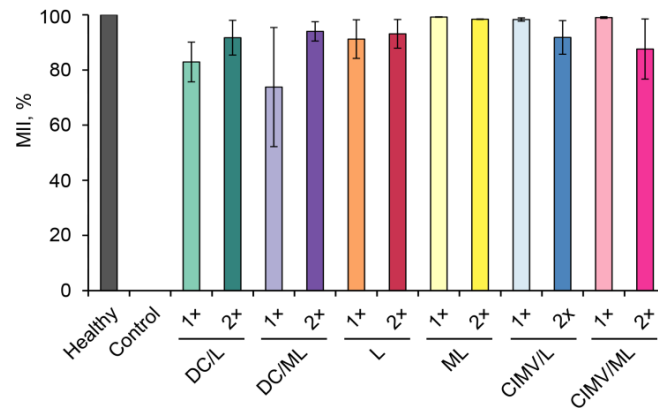

**Figure S1.** The effect of different types of the vaccines on the liver metastases in RLS<sub>40</sub>-bearing mice. Metastasis inhibition index (MII) in the control (Opti-MEM) and experimental groups was calculated as  $MII = ((\text{mean metastasis area}_{\text{control}} - \text{mean metastasis area}_{\text{experiment}}) / \text{mean metastasis area}_{\text{control}}) \times 100\%$ . The data were statistically analyzed using Student's *t*-test and are presented as mean  $\pm$  S.E.M. Statistical significance:  $p \leq 0.05$ .

**Table S1.** Morphometry of RLS<sub>40</sub> lymphosarcoma tumor tissue of mice without treatment (control) and after vaccines administration.

| Groups      | Color code                                                                        | Unchanged tumor tissue, Vv, % | Inflammatory infiltration, Vv, % | Necrotic changes, Vv, % |
|-------------|-----------------------------------------------------------------------------------|-------------------------------|----------------------------------|-------------------------|
| Control     |  | 88.5±1.9                      | 6.2±1.5                          | 4.8±0.5                 |
| DC/L(×1)    |  | n.d.*                         | n.d.                             | n.d.                    |
| DC/L(×2)    |  | 71.8±3.6 <sup>#</sup>         | 21.6±4.2 <sup>#</sup>            | 6.6±1.4                 |
| DC/ML(×1)   |  | n.d.                          | n.d.                             | n.d.                    |
| DC/ML(×2)   |  | 78±2.1 <sup>#</sup>           | 13.8±1.8 <sup>#</sup>            | 9±1.5 <sup>#</sup>      |
| L(×1)       |  | n.d.                          | n.d.                             | n.d.                    |
| L(×2)       |  | 82.9±7.6                      | 9.4±5.3                          | 7.8±2.5                 |
| ML(×1)      |  | n.d.                          | n.d.                             | n.d.                    |
| ML(×2)      |  | 84.3±6.3                      | 5.5±2.2                          | 10.2±4.1 <sup>#</sup>   |
| CIMV/L(×1)  |  | n.d.                          | n.d.                             | n.d.                    |
| CIMV/L(×2)  |  | 79.6±1.9 <sup>#</sup>         | 12.5±2.3 <sup>#</sup>            | 8±2.7                   |
| CIMV/ML(×1) |  | n.d.                          | n.d.                             | n.d.                    |
| CIMV/ML(×2) |  | 87.3±2                        | 7.9±1.2                          | 5±0.6                   |

\* n.d. – not determined. <sup>#</sup> differences from the control mice were statistically significant at  $p \leq 0.05$ .

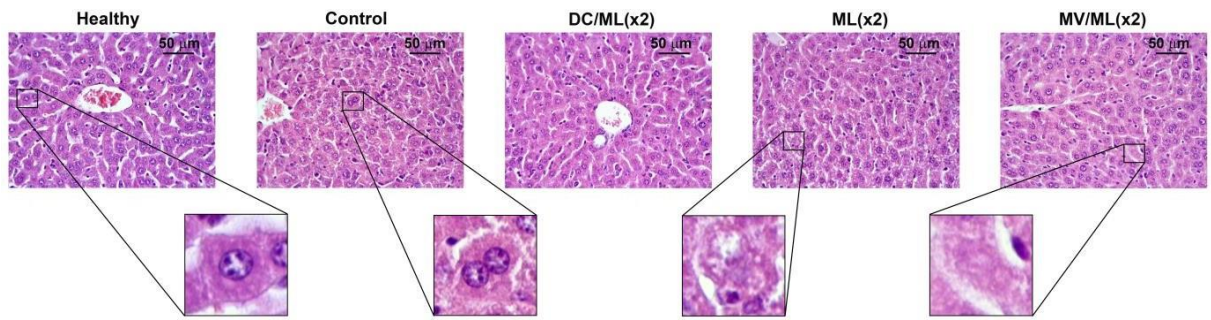

**Figure S2.** The effect of vaccines on liver in RLS<sub>40</sub>-bearing mice. Representative histological images of liver sections. Hematoxylin and eosin staining. Black boxes indicate typical examples of normal hepatocyte, binuclear hepatocyte, dystrophy and necrosis. Magnification  $\times 400$ .

**Table S2.** The effect of the vaccines on blood biochemistry of RLS<sub>40</sub>-bearing mice.

| Groups      | Color code                                                                        | ALT, U/L               | AST, U/L                | ALK, U/L                 | Total protein, g/L    |
|-------------|-----------------------------------------------------------------------------------|------------------------|-------------------------|--------------------------|-----------------------|
| Healthy     |  | 42±1.6                 | 67.3±1.5                | 68±5.5                   | 55.4±2.1              |
| Control     |  | 41.4±1.7               | 116.2±3.7*              | 63.1±2.7                 | 49.9±0.9              |
| DC/L(×1)    |  | 45.2±5.9               | 112±11.1*               | 90.1±25.8                | 55.4±4.9              |
| DC/L(×2)    |  | 36.9±5.1               | 85.1±3* <sup>#</sup>    | 117.3±33.5* <sup>#</sup> | 55.8±5.4              |
| DC/ML(×1)   |  | 39.5±6.7               | 90.3±5.1* <sup>#</sup>  | 97.8±6.9* <sup>#</sup>   | 51.5±4.2              |
| DC/ML(×2)   |  | 40.5±4.1               | 89.5±2.1* <sup>#</sup>  | 111.5±23.7* <sup>#</sup> | 54.4±2.8 <sup>#</sup> |
| L(×1)       |  | 43.5±2.8               | 93.6±3.2* <sup>#</sup>  | 110.2±23.7* <sup>#</sup> | 56.6±2.7 <sup>#</sup> |
| L(×2)       |  | 38±1.9*                | 113.6±19.2*             | 114±22.5* <sup>#</sup>   | 54.7±4.1              |
| ML(×1)      |  | 28.1±4.2* <sup>#</sup> | 74.1±3.8* <sup>#</sup>  | 61.7±6.5                 | 48.5±2.7*             |
| ML(×2)      |  | 36±3* <sup>#</sup>     | 101.7±5.5* <sup>#</sup> | 100.7±22.8* <sup>#</sup> | 53.5±3.7              |
| CIMV/L(×1)  |  | 42.5±5.3               | 123.4±15.7*             | 81.4±12.5 <sup>#</sup>   | 52.4±2.9              |
| CIMV/L(×2)  |  | 42.5±5.3               | 85.5±14.8* <sup>#</sup> | 88.6±22.3 <sup>#</sup>   | 52.4±2.9              |
| CIMV/ML(×1) |  | 34±3* <sup>#</sup>     | 69.7±7.9 <sup>#</sup>   | 81.7±15.7 <sup>#</sup>   | 49.3±4.5              |
| CIMV/ML(×2) |  | 49.8±10.2              | 91.5±3* <sup>#</sup>    | 110.5±14.3* <sup>#</sup> | 55.4±3 <sup>#</sup>   |

\* statistically significant difference relative to healthy CBA mice,  $p \leq 0.05$  <sup>#</sup> statistically significant difference relative to the control RLS<sub>40</sub>-bearing mice,  $p \leq 0.05$

**Table S3.** Liver morphometry of RLS<sub>40</sub> lymphosarcoma-bearing mice without treatment and after vaccines administration.

| Groups      | Color code                                                                        | Normal liver parenchyma, Vv, % | Dystrophy, Vv, % | Necrosis, Vv, % | Total destructive changes, Vv, % | Binuclear hepatocytes, Nv |
|-------------|-----------------------------------------------------------------------------------|--------------------------------|------------------|-----------------|----------------------------------|---------------------------|
| Healthy     |  | 76.9±1.5                       | 7.3±0.7          | 3.1±0.4         | 10.4±0.9                         | 1.5±0.2                   |
| Control     |  | 65.8±2.9*                      | 10.4±1.5*        | 12.9±1.6*       | 23.3±3*                          | 1.4±0.2                   |
| DC/L(×2)    |  | 54.2±2.5*#                     | 18±2.2*#         | 19.9±1*#        | 37.9±3*#                         | 1.7±0.2                   |
| DC/ML(×2)   |  | 65.4±1.6*                      | 8±0.6*           | 15.3±1.1*       | 23.3±1.7*                        | 1.7±0.8                   |
| L(×2)       |  | 58.5±2.7*#                     | 11.8±5.2*        | 22.3±2.6*#      | 34.1±3.4*#                       | 1.9±0.3                   |
| ML(×2)      |  | 62.2±5.4*                      | 12±2.7*          | 17.8±3.4*       | 29.8±5.9*                        | 1.4±0.5                   |
| CIMV/L(×2)  |  | 63.6±2.9*                      | 11.4±2.3*        | 13.9±1.6*       | 25.2±3.4*                        | 2.5±1.1                   |
| CIMV/ML(×2) |  | 66.3±3.3*                      | 12.6±2*          | 14.4±1.5*       | 27±2.8*                          | 4.1±0.9*#                 |

\* statistically significant difference relative to healthy CBA mice,  $p \leq 0.05$  # statistically significant difference relative to RLS<sub>40</sub>-bearing mice without treatment (control),  $p \leq 0.05$

**Table S4.** Spleen and thymus morphometry of RLS<sub>40</sub> lymphosarcoma-bearing mice without treatment (control) and after vaccine administration.

| Groups               | Color code                                                                          | Spleen morphometry           |                              |                                | Thymus morphometry           |                              |                              |
|----------------------|-------------------------------------------------------------------------------------|------------------------------|------------------------------|--------------------------------|------------------------------|------------------------------|------------------------------|
|                      |                                                                                     | Red pulp, Vv, %              | White pulp, Vv, %            | Diameter of follicles, $\mu$ m | Cortex, Vv, %                | Medulla, Vv, %               | C/M index                    |
| Healthy              |    | 57.3 $\pm$ 3.1               | 42.6 $\pm$ 1.9               | 229.9 $\pm$ 13.5               | 49.9 $\pm$ 1.6               | 45 $\pm$ 1.9                 | 1.1 $\pm$ 0.1                |
| Control              |    | 55.7 $\pm$ 3.5               | 42.3 $\pm$ 3.3               | 235.5 $\pm$ 16.5               | 50.6 $\pm$ 2.3               | 47.8 $\pm$ 2.4               | 1.1 $\pm$ 0.1                |
| DC/L( $\times$ 1)    |    | 44.8 $\pm$ 2.5 <sup>*#</sup> | 53.9 $\pm$ 2.5 <sup>*#</sup> | 197.6 $\pm$ 22.9               | 78.4 $\pm$ 6.8 <sup>*#</sup> | 26.8 $\pm$ 1.7 <sup>*#</sup> | 3 $\pm$ 0.4 <sup>*#</sup>    |
| DC/L( $\times$ 2)    |    | 33.6 $\pm$ 2.3 <sup>*#</sup> | 61.4 $\pm$ 3 <sup>*#</sup>   | 313.3 $\pm$ 21.8 <sup>*#</sup> | 72.8 $\pm$ 1.9 <sup>*#</sup> | 24 $\pm$ 2.3 <sup>*#</sup>   | 3.2 $\pm$ 0.4 <sup>*#</sup>  |
| DC/ML( $\times$ 1)   |    | 39.2 $\pm$ 4.1 <sup>*#</sup> | 60.7 $\pm$ 4.2 <sup>*#</sup> | 227.6 $\pm$ 9.2                | 73.8 $\pm$ 3.8 <sup>*#</sup> | 26.2 $\pm$ 3.8 <sup>*#</sup> | 3 $\pm$ 0.6 <sup>*#</sup>    |
| DC/ML( $\times$ 2)   |    | 29 $\pm$ 3.1 <sup>*#</sup>   | 68.8 $\pm$ 3.2 <sup>*#</sup> | 309.5 $\pm$ 12.4 <sup>*#</sup> | 68.5 $\pm$ 3.4 <sup>*#</sup> | 28.1 $\pm$ 3.4 <sup>*#</sup> | 2.5 $\pm$ 0.4 <sup>*#</sup>  |
| L( $\times$ 1)       |    | 60.7 $\pm$ 7.6               | 38.9 $\pm$ 7.6               | 249.5 $\pm$ 17.9               | 55.4 $\pm$ 2.6 <sup>*</sup>  | 43 $\pm$ 3.9                 | 1.4 $\pm$ 0.3                |
| L( $\times$ 2)       |    | 39 $\pm$ 2.3 <sup>*#</sup>   | 39.1 $\pm$ 2.3 <sup>*#</sup> | 271.1 $\pm$ 9.6 <sup>*#</sup>  | 65.1 $\pm$ 2.9 <sup>*#</sup> | 34.3 $\pm$ 2.5 <sup>*#</sup> | 1.9 $\pm$ 0.2 <sup>*#</sup>  |
| ML( $\times$ 1)      |    | 48.6 $\pm$ 4.8 <sup>*</sup>  | 51.8 $\pm$ 5.6 <sup>*#</sup> | 209 $\pm$ 7.2 <sup>*#</sup>    | 63.2 $\pm$ 2.5 <sup>*#</sup> | 36.8 $\pm$ 2.5 <sup>*#</sup> | 1.7 $\pm$ 0.2 <sup>*#</sup>  |
| ML( $\times$ 2)      |    | 41.6 $\pm$ 1.6 <sup>*#</sup> | 54.6 $\pm$ 2 <sup>*#</sup>   | 255 $\pm$ 6.3 <sup>*#</sup>    | 61.4 $\pm$ 7.8 <sup>*#</sup> | 37.3 $\pm$ 8.4 <sup>*#</sup> | 1.9 $\pm$ 0.5 <sup>*#</sup>  |
| CIMV/L( $\times$ 1)  |    | 46.7 $\pm$ 2.9 <sup>*#</sup> | 52.9 $\pm$ 3.8 <sup>*#</sup> | 286 $\pm$ 46.3 <sup>*#</sup>   | 78.6 $\pm$ 6.1 <sup>*#</sup> | 21.4 $\pm$ 1 <sup>*#</sup>   | 7.5 $\pm$ 3.7 <sup>*#</sup>  |
| CIMV/L( $\times$ 2)  |   | 33.9 $\pm$ 4.3 <sup>*#</sup> | 62.5 $\pm$ 4.1 <sup>*#</sup> | 369.8 $\pm$ 9.3 <sup>*#</sup>  | 88.5 $\pm$ 2.6 <sup>*#</sup> | 9.9 $\pm$ 2.7 <sup>*#</sup>  | 10.3 $\pm$ 2.4 <sup>*#</sup> |
| CIMV/ML( $\times$ 1) |  | 41.5 $\pm$ 4.7 <sup>*#</sup> | 58.1 $\pm$ 4.8 <sup>*#</sup> | 289.7 $\pm$ 20.1 <sup>*#</sup> | 74.2 $\pm$ 3.5 <sup>*#</sup> | 25.7 $\pm$ 3.6 <sup>*#</sup> | 3.3 $\pm$ 0.7 <sup>*#</sup>  |
| CIMV/ML( $\times$ 2) |  | 27 $\pm$ 3.9 <sup>*#</sup>   | 71 $\pm$ 4.2 <sup>*#</sup>   | 321 $\pm$ 32.1 <sup>*#</sup>   | 85.4 $\pm$ 5.4 <sup>*#</sup> | 13.5 $\pm$ 5 <sup>*#</sup>   | 13 $\pm$ 4.6 <sup>*#</sup>   |

\* Statistically significant difference relative to healthy CBA mice,  $p \leq 0.05$ . # Statistically significant difference relative to RLS<sub>40</sub>-bearing mice without treatment,  $p \leq 0.05$
